# Supplementary material for: Colorimetric detection of copper ions in sub-micromolar concentrations using a triarylamine-linked resin bead
Source: Royal Society of Chemistry journal article supplement (doi:10.1039/c2an35724k), 2012-01-01

## Supporting Information

for

### Colorimetric detection of Copper ions in sub-micromolar concentrations using a triarylamine-linked resin bead

Tony George Thomas, Kesavapillai Sreenath and Karical R. Gopidas\*

*Photosciences and Photonics, Chemical Sciences and Technology Division, National Institute for Interdisciplinary Science and Technology, Council of Scientific and Industrial Research (CSIR), Trivandrum 695 019, India*

| Contents                                                                                                | Page |
|---------------------------------------------------------------------------------------------------------|------|
| (1) Cyclic voltammograms of $\text{Cu}^{2+}$ in ACN/water mixtures                                      | S2   |
| (2) Plot of redox potential of $\text{Cu}^{2+}/\text{Cu}^+$ vs. water content in ACN                    | S3   |
| (3) Effect of addition of water to ETPA <sup>•+</sup> solution in ACN                                   | S4   |
| (4) Photograph of ETPA solutions in the presence of varying amounts of $\text{Cu}^{2+}$ .               | S5   |
| (5) Plot showing the interference of other metal ions                                                   | S5   |
| (6) Photograph showing the reusability of the device                                                    | S6   |
| (7) Photograph of Tentagel without ETPA after treatment with $\text{Cu}^{2+}$                           | S6   |
| (8) Photograph of the device dipped in millimolar solutions of various metal ions in ACN/water mixtures | S7   |

Figure S1. Cyclic voltammograms of  $\text{Cu}^{2+}$  in ACN/water mixtures

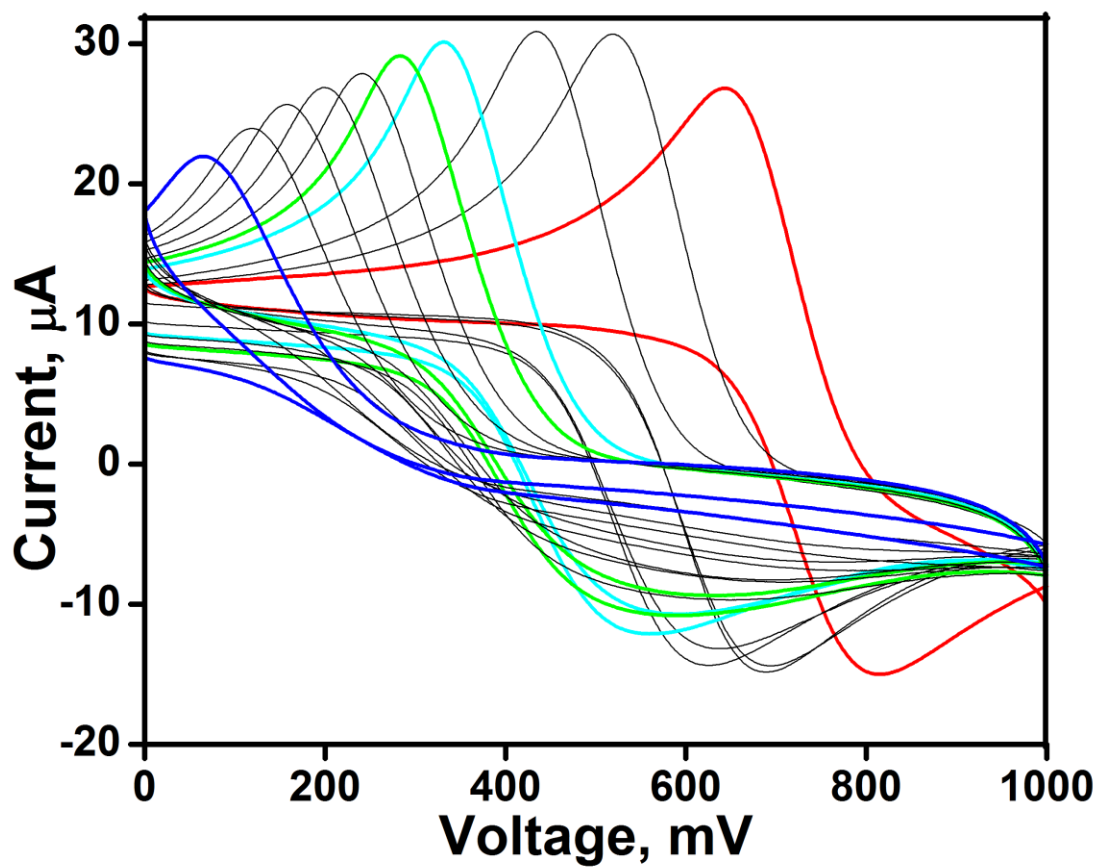

Figure S2. Plot of redox potential of  $\text{Cu}^{2+}/\text{Cu}^{+}$  vs. water content in ACN

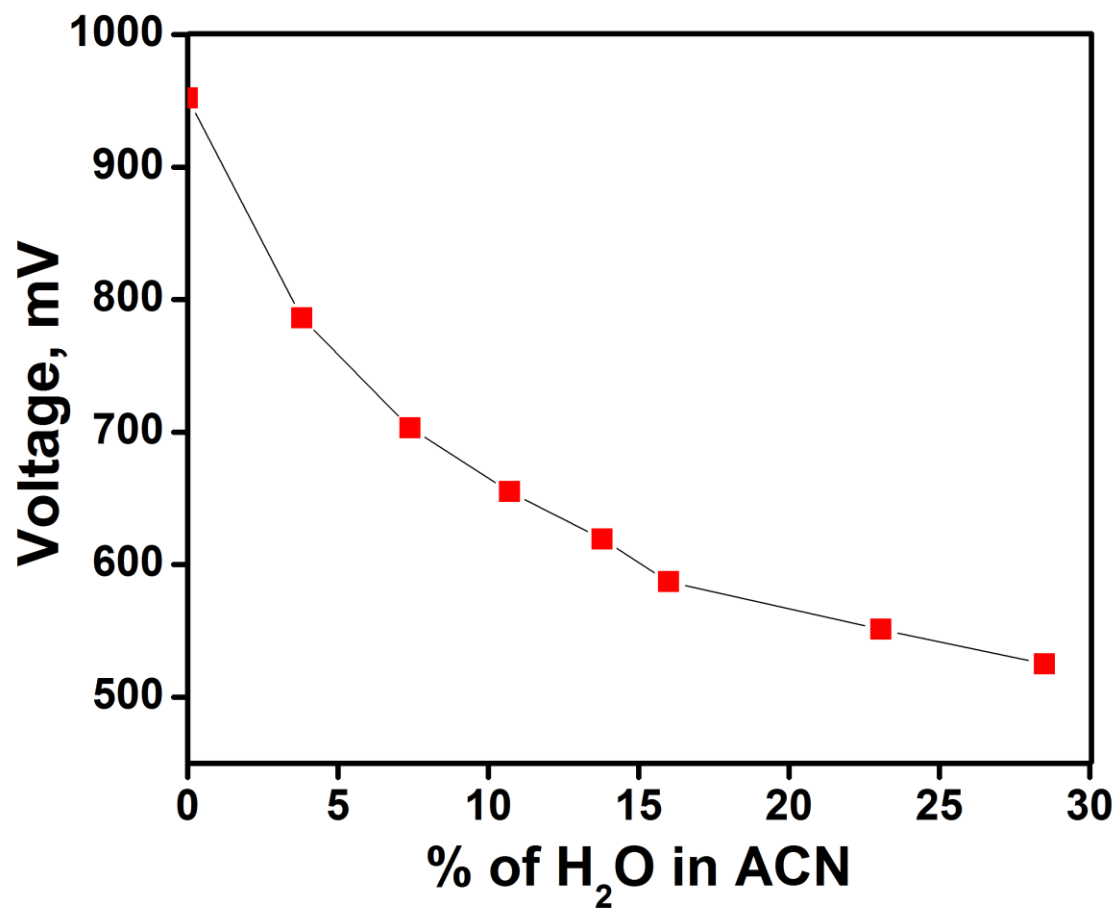

Figure S3. Effect of addition of water to ETPA<sup>•+</sup> solution in ACN

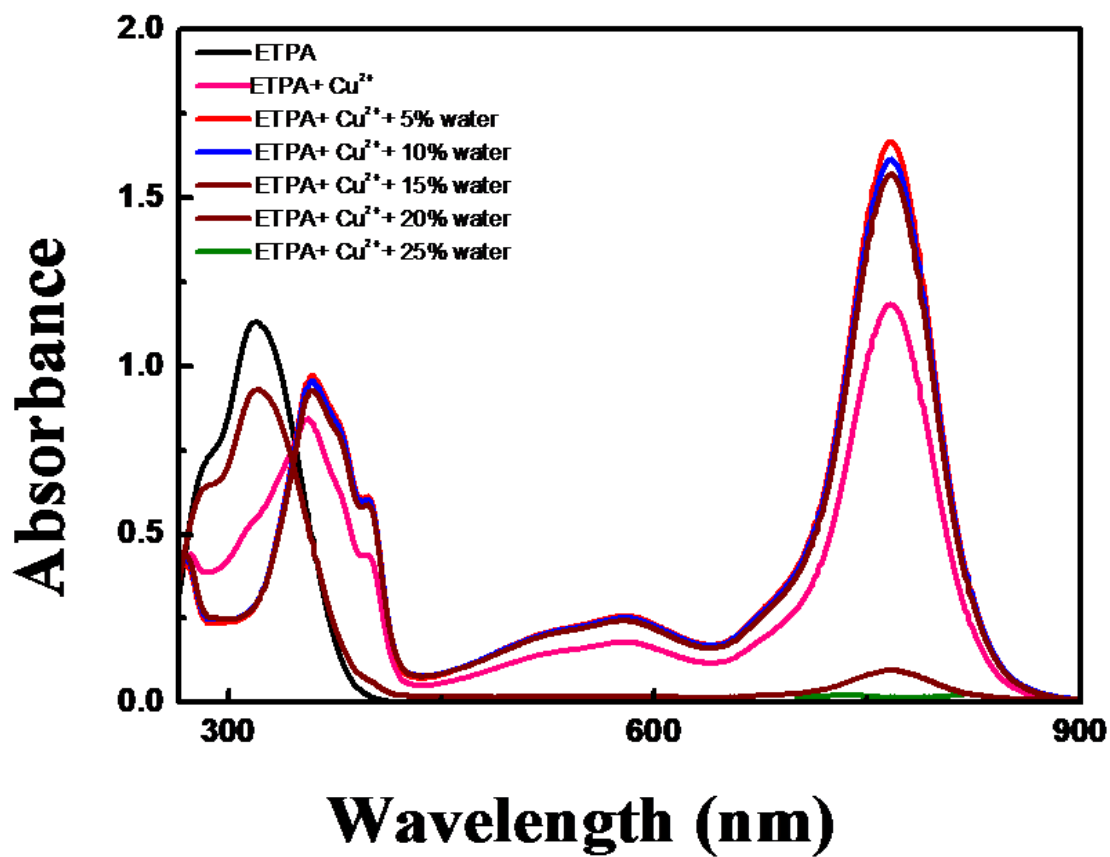

The plot shows addition of water to a solution containing  $3 \times 10^{-5}$  M ETPA and 1 equiv of Cu<sup>2+</sup>.

**Figure S4. Photograph of ETPA solutions in the presence of varying amounts of  $\text{Cu}^{2+}$**

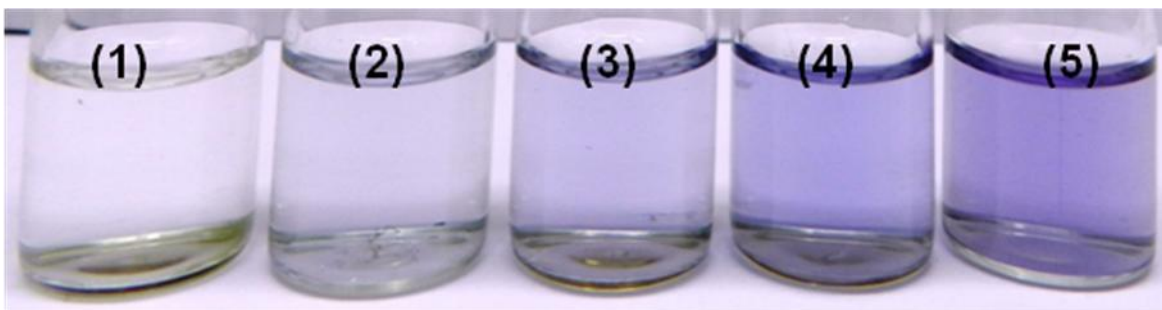

$\text{Cu}^{2+}$  concentrations were 0, 0.25, 0.5, 0.75, and 1.0 equiv for solutions 1-5.

**Figure S5. Plot showing the interference of other metal ions**

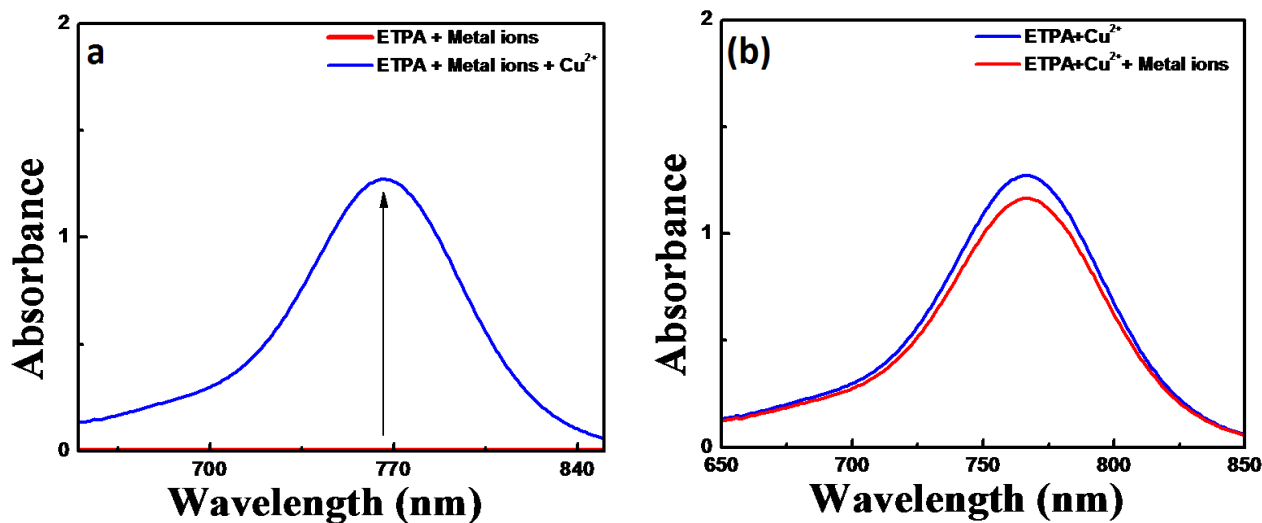

Plot (a) shows the change in absorbance when  $\text{Cu}^{2+}$  is added to a solution ETPA + 5 Metal ions ( $\text{Co}^{3+}$ ,  $\text{Cd}^{2+}$ ,  $\text{Pb}^{2+}$ ,  $\text{Fe}^{2+}$ ,  $\text{Na}^+$ ). Plot (b) shows the change in absorbance when Metal ions ( $\text{Co}^{3+}$ ,  $\text{Cd}^{2+}$ ,  $\text{Pb}^{2+}$ ,  $\text{Fe}^{2+}$ ,  $\text{Na}^+$ ) are added to solution of ETPA +  $\text{Cu}^{2+}$ .

**Figure S6. Photograph showing the reusability of the device**

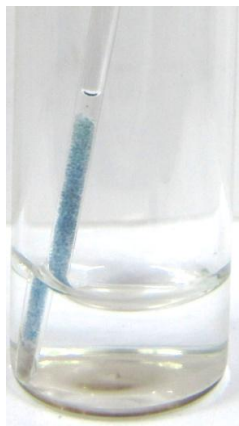

The Photograph shows the device dipped in ACN solution in the 21<sup>st</sup> run (the second method as described in the “Device for naked eye detection of Cu<sup>2+</sup> in water” section of the manuscript was employed).

**Figure S7. Photograph of Tentagel without ETPA after treatment with Cu<sup>2+</sup>**

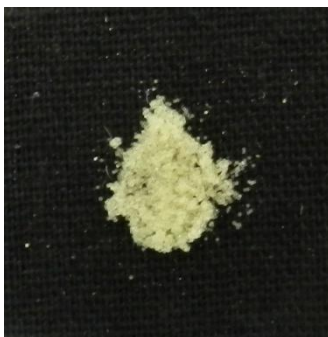

**Figure S8. Photograph of the device dipped in millimolar solutions of various metal ions in ACN/water mixtures**

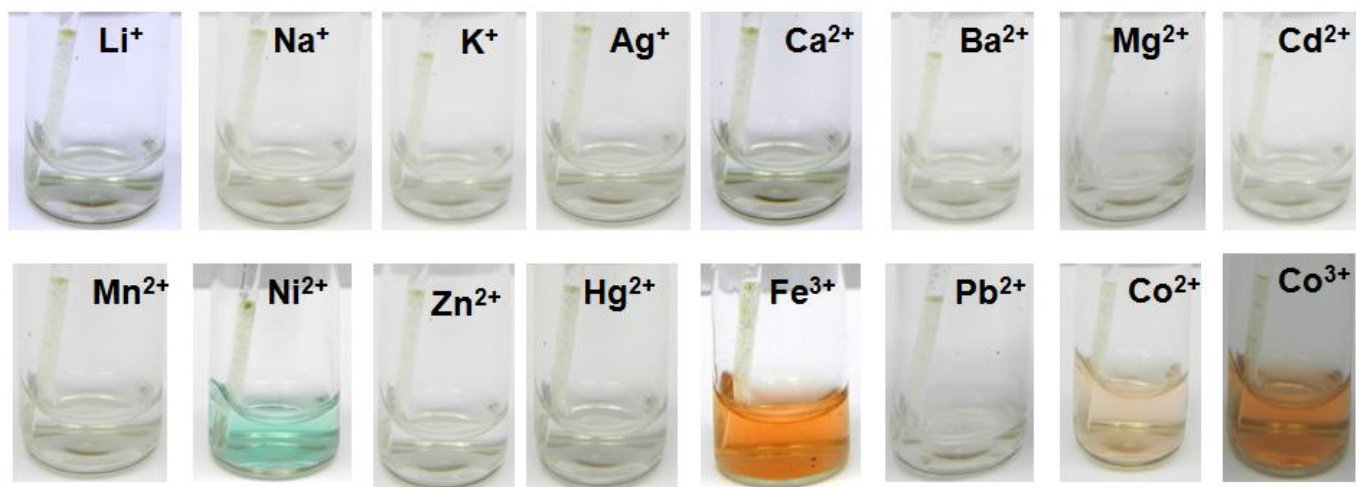

Supplement: c2an35724k.pdf [file c2an35724k.pdf]
